# Supplementary material for: The rare nonsense mutation in p53 triggers alternative splicing to produce a protein capable of inducing apoptosis
Source: PubMed Central journal article supplement (PMC5621691; doi:10.1371/journal.pone.0185126), 2017-09-29
Supplement: pone.0185126.s003.pdf [file pone.0185126.s003.pdf]

## Supporting Information – S3 File

```
PR00386 Motif 1 width=27
Element                               Seqn Id
SGTAKSVTCTYSPSLNKLFCQLAKTCP         O36006
SGTAKSVTCTYSPCLNKLFCQLAKTCP         P53\_RABIT
SGTAKSVTCTYSPDLNKMFCQLAKTCP         P53\_CERAE
SGTAKSVTCTYSPDLNKMFCQLAKTCP         P53\_MACFA
SGTAKSVTCTYSPDLNKMFCQLAKTCP         P53\_MACMU
SGTAKSVTWTYSPLLNKLFCQLAKTCP         P53\_CANFA
SGTAKSVTCTYSPPLNKLFCQLAKTCP         P53\_FELCA
SGTAKSVTCTYSPALNKMFCQLAKTCP         P53\_HUMAN
SGTAKSVTCTYSPALNKMFCQLAKTCP         Q16848
SGTAKSVMCTYISLNLKFCQLAKTCP         P53\_RAT
SGTAKSVMCTYSPPLNKLFCQLAKTCP         O70366
SGTAKSVMCTYSPPLNKLFCQLAKTCP         P53\_MOUSE
SGTAKSVTCTYSPSLNKLFCQLAKTCP         P53\_CRIGR
SGTAKSVTCTYSPSLNKLFCQLAKTCP         P53\_MESAU
SGTAKSVTCTYSPSLNKLFCQLAKTCP         P53\_SHEEP
SGTAKSVTCTYSPSLNKLFCQLAKTCP         P53\_BOVIN
SGTAKSVTCTYSPDLNKLFCQLAKTCP         P53\_BRARE
NGTAKSVTCTYSPENKLFCQLAKTCP         P53\_XENLA
SSTAKSVTCTYSPDLNKLFCQLAKTCP         P53\_SALIR
AGTAKSVTCTYSPVLNKVYCRLAQPCP         P53\_CHICK
SSTAKSATWTYSTEKLLKLYCQIAKTCP         O75080
SSTAKSATWTYSTEKLLKLYCQIAKTCP         O75195
SSTAKSATWTYSTEKLLKLYCQIAKTCP         O75922
SSTAKSATWTYSTEKLLKLYCQIAKTCP         O76078
SSTAKSATWTYSTEKLLKLYCQIAKTCP         O88897
SSTAKSATWTYSTEKLLKLYCQIAKTCP         O88898
SSTAKSATWTYSTEKLLKLYCQIAKTCP         O88899
SSTAKSATWTYSTEKLLKLYCQIAKTCP         O89097
SSGTKSVTCTYSPDLNKLFCQLAKTCP         O93379
SSTAKSATWTYSPLLKLLKLYCQIAKTCP         O15350
SSTAKSATWTYSPLLKLLKLYCQIAKTCP         O15351
SGTAKSVTSTYSVKLGKLFQQLAKTTP         Q92143
SGTAKSVTSTYSVKLGKLFQQLAKTTP         O57538
SGTAKSVTSTYSETLNKLYCQLAKTSP         P53\_ORYLA
SGTAKSVTSTFSELLKLYCQLAKTSP         P53\_PLAFE
SKETKSTTWTYSEKLDKLYVRMATTCP         Q27937
```

**S3 Fig. The GenBank alignment of the p53 sequences from different species surrounding the tyrosine at amino acid position 126. Y126 is highlighted in yellow; the protein accession numbers are in blue.**
